# Supplementary material for: “I Need Someone to Help Me Build Up My Strength”: A Meta-Synthesis of Lived Experience Perspectives on the Role and Value of a Dietitian in Eating Disorder Treatment
Source: MDPI journal article supplement (doi:10.3390/bs13110944), 2023-11-17
Supplement: s1 [file s1]

# “I Need Someone to Help Me Build Up My Strength”: A Meta-Synthesis of Lived Experience Perspectives on the Role and Value of a Dietitian in Eating Disorder Treatment

Yive Yang <sup>1</sup>, Janet Conti <sup>1,2</sup>, Caitlin M. McMaster <sup>3,4,5,6</sup>, Milan K. Piya <sup>1,7</sup> and Phillipa Hay <sup>1,7,\*</sup>

- <sup>1</sup> Translational Health Research Institute, School of Medicine, Western Sydney University, Campbelltown, NSW 2560, Australia; yive.yang@gmail.com (Y.Y.); j.conti@westernsydney.edu.au (J.C.); m.piya@westernsydney.edu.au (M.K.P.)
- <sup>2</sup> School of Psychology, Western Sydney University, Penrith, NSW 2750, Australia
- <sup>3</sup> Sydney School of Health Sciences, Faculty of Medicine and Health, University of Sydney, Camperdown, NSW 2050, Australia; caitlin.mcmaster@sydney.edu.au
- <sup>4</sup> Eating Disorder and Nutrition Research Group (ENRG), Translational Health Research Institute, Faculty of Medicine, Western Sydney University, Campbelltown, NSW 2560, Australia
- <sup>5</sup> South Western Sydney Local Health District, Liverpool, NSW 2170, Australia
- <sup>6</sup> Ingham Institute for Applied Medical Research, Liverpool, NSW 2170, Australia
- <sup>7</sup> Camden and Campbelltown Hospitals, South Western Sydney Local Health District, Liverpool, NSW 2560, Australia
- \* Correspondence: p.hay@westernsydney.edu.au

**Table S4.** Summary of included studies and their themes.

| Paper           | Theme                                                               | Subtheme                                                        |
|-----------------|---------------------------------------------------------------------|-----------------------------------------------------------------|
| Bakland, 2019   | Perceptions of impact                                               | Obtaining tools                                                 |
|                 |                                                                     | Developing new perspectives                                     |
|                 | Perceptions of treatment organisation and completion                | Planning and framing                                            |
|                 |                                                                     | Therapists' competence                                          |
| Blumental, 2020 | Weight-biased nutrition treatment experiences                       | Weight-cantered nutrition treatment                             |
|                 |                                                                     | Nutrition provider views about higher weight                    |
|                 |                                                                     | Thin provider phenotype                                         |
|                 | Weight-inclusive nutrition treatment experiences                    | Health At Every Size® and Intuitive Eating nutrition approaches |
|                 |                                                                     | Nutrition provider validation of patient's eating disorder      |
|                 |                                                                     | Nutrition provider acknowledgement of thin privilege            |
|                 | Participant ideas for improved future support                       | Provider should acknowledge own privilege                       |
| Bravender, 2017 | Appreciation for having a respite from meal planning/responsibility | More diverse eating disorder providers                          |
| Darden, 2017    | Facilitators to forming a therapeutic working alliance with an RDN  | Personality characteristics                                     |
|                 |                                                                     | Emotional support                                               |
|                 |                                                                     | Collaborative decision making                                   |
|                 |                                                                     | Client-centered approach                                        |
|                 |                                                                     | Self-disclosure                                                 |
|                 |                                                                     | Expertise/knowledge                                             |
|                 | Barriers to forming a therapeutic working alliance with an RDN      | Disregard                                                       |
|                 |                                                                     | Personality characteristics                                     |
|                 |                                                                     | Nature of the eating disorder                                   |
|                 |                                                                     | Nature of the dietitian's role                                  |
|                 |                                                                     | Assumptions                                                     |
|                 |                                                                     | Lack of proper support                                          |

|                    |                                                                                                                                                                                                                                                                                                                                              |                                                                                                                  |
|--------------------|----------------------------------------------------------------------------------------------------------------------------------------------------------------------------------------------------------------------------------------------------------------------------------------------------------------------------------------------|------------------------------------------------------------------------------------------------------------------|
|                    |                                                                                                                                                                                                                                                                                                                                              | Poor communication                                                                                               |
|                    |                                                                                                                                                                                                                                                                                                                                              | Power struggle                                                                                                   |
| Elran-Barak (2021) | Silent dialogue: Talking is useless (client's position) - This position describes users' unwillingness to be truly engaged in a dialogue with their rds. Users described that they wanted to remain in full control of their ED; therefore, they did not want their RD's involvement.                                                        |                                                                                                                  |
|                    | Acting out: Cancellation and deception (client's position) - describes the occasions in which users felt that it was not possible to resolve their disagreements with their RDs through genuine dialogue. In these occasions, women saw their relationship with the RD as a war they needed to win rather than as a cooperative relationship |                                                                                                                  |
|                    | Tough love: Firm boundaries accompanied by empathy (RD's position) - RDs frequently responded by setting firm and clear boundaries                                                                                                                                                                                                           |                                                                                                                  |
|                    | Containment: Concern and understanding (RD's position) - includes descriptions of caring and supportive RDs who created a containing atmosphere: that is, RDs who took it upon themselves to go the extra mile and make clients feel seen and understood                                                                                     |                                                                                                                  |
| Heafala, 2022      | Valuing a person-centered approach to dietetic care                                                                                                                                                                                                                                                                                          | Connecting with the individual and adapting care to the needs of consumers                                       |
|                    |                                                                                                                                                                                                                                                                                                                                              | Empowering consumers and carers with knowledge and skills to navigate recovery                                   |
|                    |                                                                                                                                                                                                                                                                                                                                              | Taking a holistic and inclusive approach to dietetic care                                                        |
|                    |                                                                                                                                                                                                                                                                                                                                              | Perceiving communication and coordination between treating team, consumers and carers as beneficial for recovery |
|                    |                                                                                                                                                                                                                                                                                                                                              | Dietitians' understanding, experience and expertise in eds                                                       |
|                    | The therapeutic alliance is central to engaging in dietetic care                                                                                                                                                                                                                                                                             | Consumers perceiving mutual trust, empathy and rapport as integral to therapeutic alliance                       |
|                    |                                                                                                                                                                                                                                                                                                                                              | Accountability, support and validation perceived as important for ongoing dietetic care                          |
|                    | Sharing the complex journey                                                                                                                                                                                                                                                                                                                  | Carers recognizing the signs and symptoms and advocating for help                                                |
|                    |                                                                                                                                                                                                                                                                                                                                              | Consumers and dietitians needing patience and perseverance, and trusting the process of recovery                 |
|                    |                                                                                                                                                                                                                                                                                                                                              | Choosing recovery and having a support system                                                                    |
|                    |                                                                                                                                                                                                                                                                                                                                              | Dietitians considering impact on families and reinforcing role of nutrition in recovery                          |
|                    |                                                                                                                                                                                                                                                                                                                                              | Prioritizing and balancing treatment with daily life                                                             |
| Lyons, 2018        | The dietitian/nutritionist was almost expecting to work with someone who both physically                                                                                                                                                                                                                                                     |                                                                                                                  |

|                       |                                                                                                                                                                                                  |                                                  |
|-----------------------|--------------------------------------------------------------------------------------------------------------------------------------------------------------------------------------------------|--------------------------------------------------|
|                       | and mentally wanted to eat and therefore provided general information on what to eat and when, but not on how to actually eat or to work with the men's individual issues.                       |                                                  |
| Marek, 1995           | Biological components that contribute to the etiology, treatment, and outcomes for those experiencing eating problems – represented by nutritional counseling provided by a registered dietitian | Desired changes in eating patterns               |
|                       |                                                                                                                                                                                                  | Need for general nutritional information         |
|                       |                                                                                                                                                                                                  | Desire for personalized nutritional information  |
|                       |                                                                                                                                                                                                  | Participant concerns                             |
|                       | "Having the three components together was most important?" - emotional, the physical, the social elements all addressed                                                                          |                                                  |
| Munro, 2014           | Staff perceived as supportive, caring and genuine                                                                                                                                                |                                                  |
|                       | Patients valued a holistic psychological approach based on emotional and physical needs and not just weight                                                                                      |                                                  |
|                       | Patients valued individualised care                                                                                                                                                              |                                                  |
| Petry, 2017           | Feelings and perceptions about eating behaviors after the anorexia nervosa experience                                                                                                            |                                                  |
| Reyes-Rodriguez, 2016 | Describing eating patterns                                                                                                                                                                       |                                                  |
|                       | Emotional distress                                                                                                                                                                               |                                                  |
|                       | Latino cultural values                                                                                                                                                                           |                                                  |
|                       | Family conflicts associated with disturbed eating behaviors                                                                                                                                      |                                                  |
|                       | Lack of knowledge of healthy eating                                                                                                                                                              |                                                  |
|                       | Treatment progress                                                                                                                                                                               |                                                  |
| Taylor, 2021          | Disconnects<br>(between clinician and patient perspectives)                                                                                                                                      | Isolated clinicians within treatment teams       |
|                       |                                                                                                                                                                                                  | Separating physical and psychological dimensions |
|                       |                                                                                                                                                                                                  | Divergent orientations toward tracking           |
| Roots, 2009           | Importance and availability of dietetic therapy                                                                                                                                                  |                                                  |
| Thompson, 2007        | Interpersonal relationships are perceived as Important in the recovery process                                                                                                                   |                                                  |
| Woodruff, 2020        | Relying on the lifeline of communication                                                                                                                                                         |                                                  |
|                       | Supporting autonomy                                                                                                                                                                              |                                                  |
|                       | Drawing on individual strengths                                                                                                                                                                  |                                                  |
|                       | Valuing synergy                                                                                                                                                                                  |                                                  |
