# Supplementary material for: “I Need Someone to Help Me Build Up My Strength”: A Meta-Synthesis of Lived Experience Perspectives on the Role and Value of a Dietitian in Eating Disorder Treatment
Source: MDPI journal article supplement (doi:10.3390/bs13110944), 2023-11-17
Supplement: s1 [file s1]

# “I Need Someone to Help Me Build Up My Strength”: A Meta-Synthesis of Lived Experience Perspectives on the Role and Value of a Dietitian in Eating Disorder Treatment

Yive Yang <sup>1</sup>, Janet Conti <sup>1,2</sup>, Caitlin M. McMaster <sup>3,4,5,6</sup>, Milan K. Piya <sup>1,7</sup> and Phillipa Hay <sup>1,7,\*</sup>

- <sup>1</sup> Translational Health Research Institute, School of Medicine, Western Sydney University, Campbelltown, NSW 2560, Australia; yive.yang@gmail.com (Y.Y.); j.conti@westernsydney.edu.au (J.C.); m.piya@westernsydney.edu.au (M.K.P.)
- <sup>2</sup> School of Psychology, Western Sydney University, Penrith, NSW 2750, Australia
- <sup>3</sup> Sydney School of Health Sciences, Faculty of Medicine and Health, University of Sydney, Camperdown, NSW 2050, Australia; caitlin.mcmaster@sydney.edu.au
- <sup>4</sup> Eating Disorder and Nutrition Research Group (ENRG), Translational Health Research Institute, Faculty of Medicine, Western Sydney University, Campbelltown, NSW 2560, Australia
- <sup>5</sup> South Western Sydney Local Health District, Liverpool, NSW 2170, Australia
- <sup>6</sup> Ingham Institute for Applied Medical Research, Liverpool, NSW 2170, Australia
- <sup>7</sup> Camden and Campbelltown Hospitals, South Western Sydney Local Health District, Liverpool, NSW 2560, Australia
- \* Correspondence: p.hay@westernsydney.edu.au

**Table S1.** Search strategy used on the Ovid MEDLINE(R) ALL platform.

|    |                                                                                                                                                                                                                                                                                                                                                                                                                                                                                                                                                      |
|----|------------------------------------------------------------------------------------------------------------------------------------------------------------------------------------------------------------------------------------------------------------------------------------------------------------------------------------------------------------------------------------------------------------------------------------------------------------------------------------------------------------------------------------------------------|
| 1  | exp "Feeding and Eating Disorders"/                                                                                                                                                                                                                                                                                                                                                                                                                                                                                                                  |
| 2  | (eating disorder* or disordered eating or anorexi* or bulimi* or binge or feeding disorder* or orthorexia or muscle dysmorphia or rumination disorder* or purging disorder* or night eating syndrome or intake disorder* or ARFID or EDNOS or OSFED or UFED or PICA).ti. or (eating disorder* or disordered eating or anorexi* or bulimi* or binge or feeding disorder* or orthorexia or muscle dysmorphia or rumination disorder* or purging disorder* or night eating syndrome or intake disorder* or ARFID or EDNOS or OSFED or UFED or PICA).ab. |
| 3  | 1 or 2                                                                                                                                                                                                                                                                                                                                                                                                                                                                                                                                               |
| 4  | Dietetics/ or Nutritionists/                                                                                                                                                                                                                                                                                                                                                                                                                                                                                                                         |
| 5  | (dieti#ian* or dietetic* or nutrition*).ti. or (dieti#ian* or dietetic* or nutrition*).ab.                                                                                                                                                                                                                                                                                                                                                                                                                                                           |
| 6  | 4 or 5                                                                                                                                                                                                                                                                                                                                                                                                                                                                                                                                               |
| 7  | nutrition therapy/ or diet therapy/ or nutritional support/ or professional role/ or "scope of practice"/                                                                                                                                                                                                                                                                                                                                                                                                                                            |
| 8  | (treatment* or counsel* or therap* or intervention* or care or consult* or recommend* or plan or advice or management or educat* or prescri* or support or role* or function*).ti. or (treatment* or counsel* or therap* or intervention* or care or consult* or recommend* or plan or advice or management or educat* or prescri* or support or role* or function*).ab.                                                                                                                                                                             |
| 9  | 7 or 8                                                                                                                                                                                                                                                                                                                                                                                                                                                                                                                                               |
| 10 | 3 and 6 and 9                                                                                                                                                                                                                                                                                                                                                                                                                                                                                                                                        |
