# Supplementary material for: “I Need Someone to Help Me Build Up My Strength”: A Meta-Synthesis of Lived Experience Perspectives on the Role and Value of a Dietitian in Eating Disorder Treatment
Source: Behav Sci (Basel). 2023 Nov 17;13(11):944. doi: 10.3390/bs13110944 (PMC10669240; doi:10.3390/bs13110944)
Supplement: Supplementary file 1 [file behavsci-13-00944-s001.zip]

Archive with 5 entries (5 files):
- Supplementary file S1 - Search strategy.pdf
- Supplementary file S2 - Full-text inclusion and exclusion criteria.pdf
- Supplementary file S3 - Quality appraisal.pdf
- Supplementary file S4 - Summary of included studies and their themes.pdf
- Supplementary file S5 - Additional exemplar extracts.pdf
